# Supplementary material
Source: PubMed Central journal article supplement (PMC4946251)

# Supplementary Figure 1

## A. NMF analysis of human PanNET– core clinical miR dataset

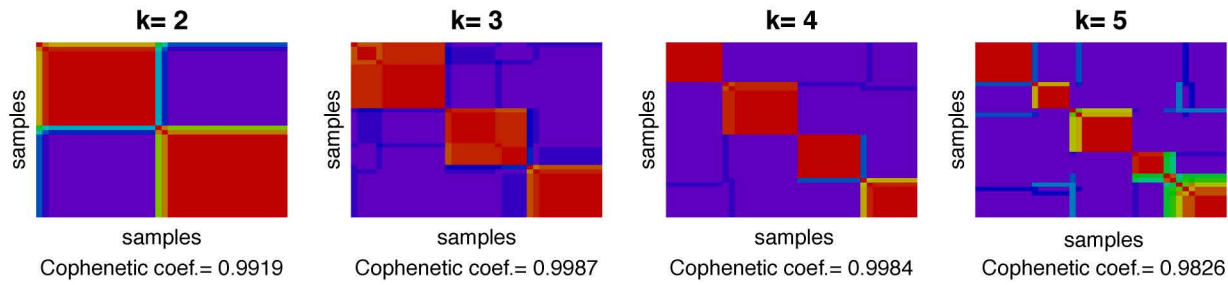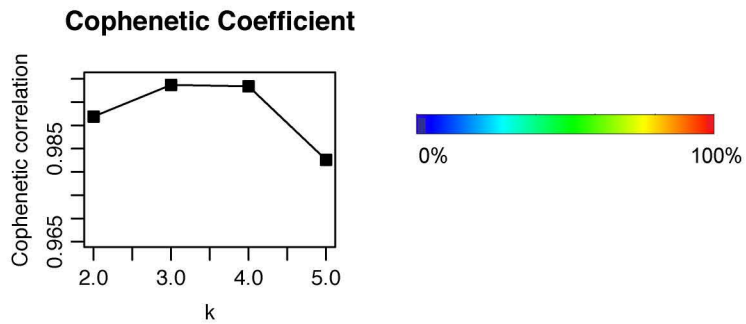

## B. NMF analysis of human PanNET miR – validation dataset

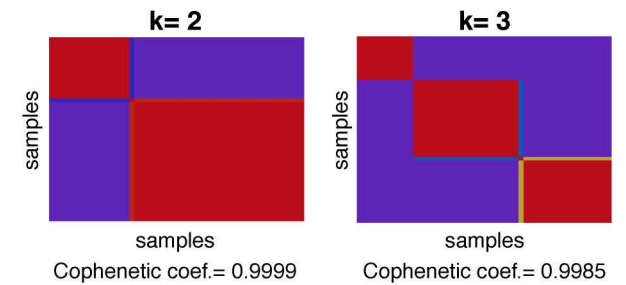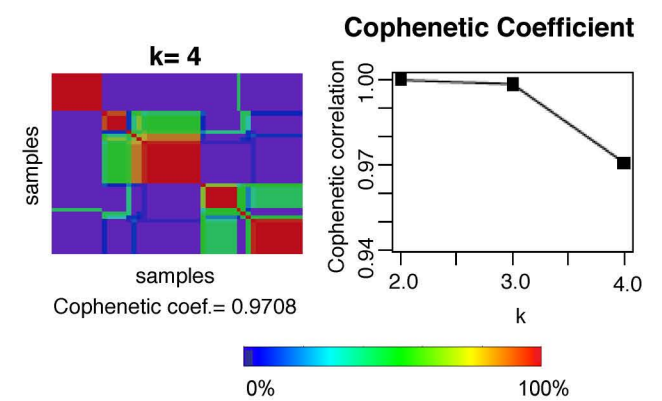

## C. miR subtypes - validation dataset

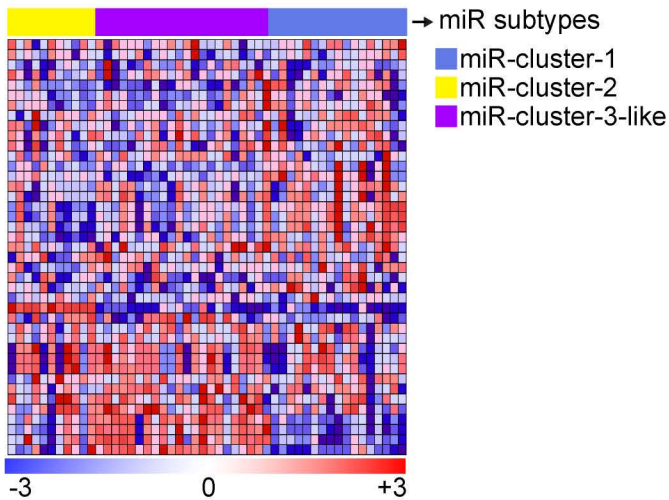

Supplementary Figure 2

A. NMF analysis of human PNET – core clinical gene expression dataset

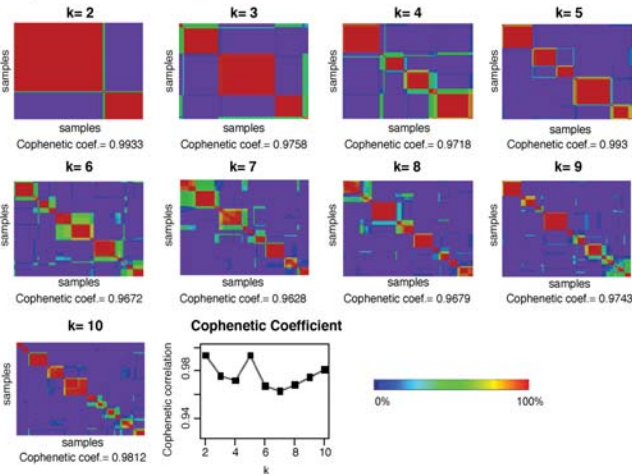

B. NMF analysis of human PNET gene expression validation dataset

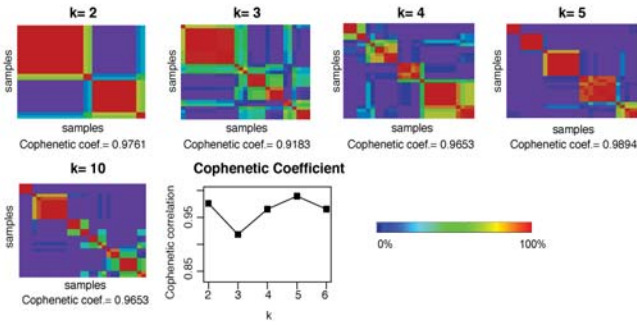

C. Gene expression subtypes – validation dataset

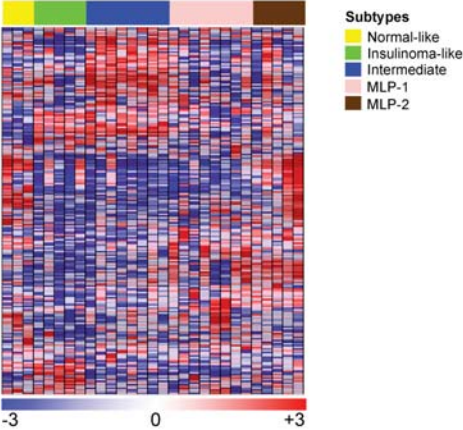

Supplementary Figure 3

Cross-species analysis - gene expression data of human and mouse PanNET merged together using DWD

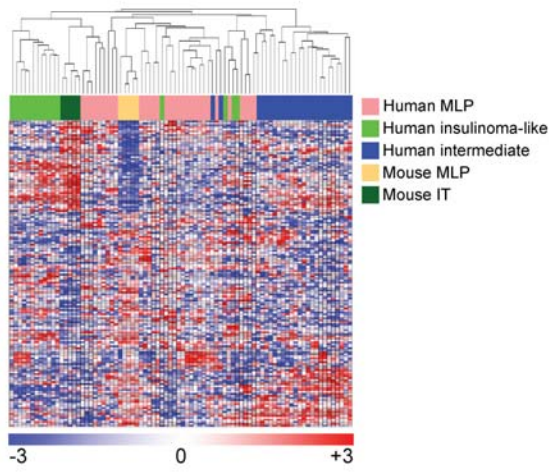

## Supplementary Figure 4

mRNA expression of *ENPP2* and *INS* in different subtypes - microarray data

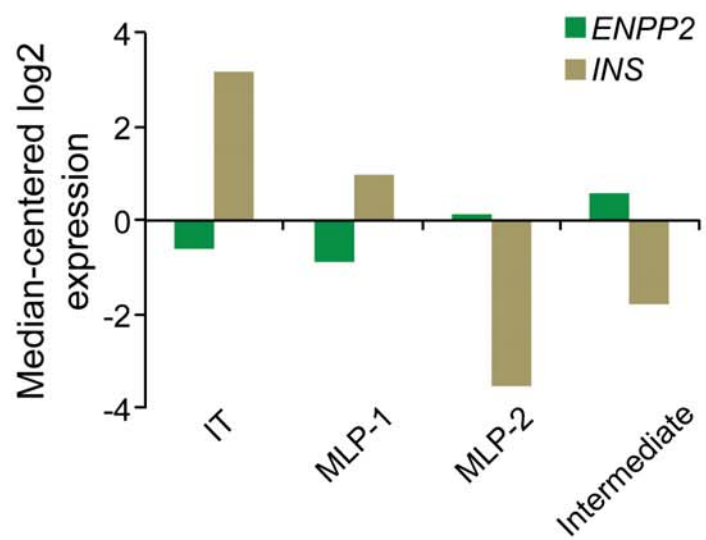

Supplementary Figure 5

A. Gene expression of invasive carcinoma compared to RT2 subtypes

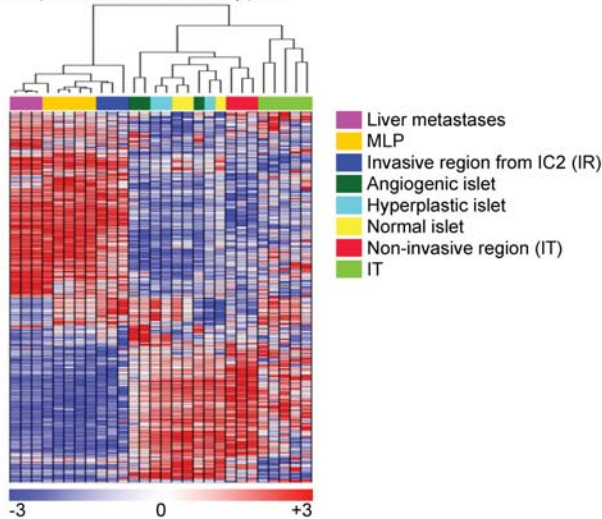

B. Progenitor, metabolic and mature  $\beta$  cell genes in microdissected IT vs invasive region from IC2.

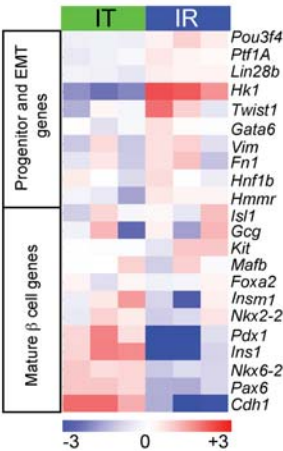

## Supplementary Figure 6

Metabolite profiles from IT and MLP cell lines

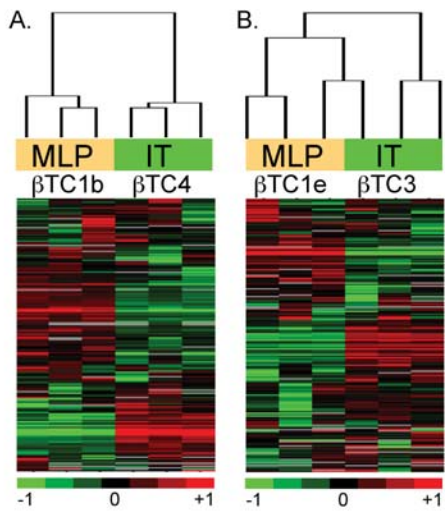

Supplement: NIHMS780097-supplement-Supplementary_Figures_1-6.pdf [file NIHMS780097-supplement-Supplementary_Figures_1-6.pdf]
